# Supplementary material for: Association of the CFTR Gene With Asthma and Airway Mucus Hypersecretion
Source: Research Square preprint supplement (doi:10.21203/rs.3.rs-115311/v1), 2020-12-01
Supplement: Supplementary file 1 [file 810466da18b3014598148b21.docx]

| **Genetic variant** | **Hypersecretors**  (N=39) | **Non-hypersecretors**  (N=59) | **p** |
| --- | --- | --- | --- |
| **c.1680-870T>A** | **25%/46.2%** | **75%/53.8%** | **0.036** |
| **c.1680-871A>G** | 100%/0% | 98.3%/1.69% | 0.608 |
| **c.1727G>C [p.(Gly576Ala)]** | 94.73%/5.26% | 98.3%/1.69% | 0.339 |
| **c.2002C>T [p.(Arg668Cys)]** | 92.10%/7.89% | 98.3%/1.69% | 0.165 |
| **c.2047_2052delAAAAAAinsAAAAG [p.(Lys684Serfs*38)]** | 97.36%/2.63% | 100%/ | 0.392 |
| **c.2260G>A [p.(Val754Met)]** | 97.36%/2.63% | 100%/ | 0.392 |
| **c.2506G>T [p.(Asp836Tyr)]** | 97.36%/2.63% | 94.91%/5.08% | 0.488 |
| **c.2562T>G (p.=)** | 50%/50% | 54.23%/45.76% | 0.421 |
| **c.2619+3A>G** | 100%/ | 98.3%/1.69% | 0.608 |
| **c.2619+85_2619+86delAT** | 44.73%/55.26% | 54.23%/45.76% | 0.24 |
| **c.2619+106T>A** | 86.84%/13.55% | 86.44%/13.55% | 0.604 |
| **c.2909-71G>C** | 97.36%/2.63% | 91.52%/8.47% | 0.238 |
| **c.2909-92G>A** | 65.78%/34.21% | 71.18%/28.81% | 0.366 |
| **c.2991G>C [p.(Leu997Phe)]** | 100%/ | 98.3%/1.69% | 0.608 |
| **c.3139+42A>T** | 100%/ | 98.3%/1.69% | 0.608 |
| **c.3140-92T>C** | 97.36%/2.63% | 89.83%/10.16% | 0.16 |
| **c.3285A>T [p.(Thr1095Thr)]** | 97.36%/2.63% | 100%/ | 0.392 |
| **c.3367+37G>A** | 97.36%/2.63% | 100%/ | 0.392 |
| **c.3705T>G [p.(Ser1235Arg)]** | 92.10%/7.89% | 96.61%/3.38% | 0.299 |
| **c.3808G>A [p.(Asp1270Asn)]** | 100%/ | 98.3%/1.69% | 0.808 |
| **c.3870A>G** | 97.36%/2.63% | 91.52%/8.47% | 0.238 |
| **c.3874-200G>A** | 94.74%/5.26% | 94.91%/5.08% | 0.654 |
| **c.3909C>G [p.(Asn1303Lys)]** | 100%/ | 98.3%/1.69% | 0.608 |
| **c.4137-139G>A** | 57.89%/42.10% | 71.18%/28.81% | 0.13 |
| **c.4243-20A>G** | 100%/ | 98.3%/1.69% | 0.608 |

**Supplementary material**

Table 1. Summary of the genetic variants in the *CFTR* (cystic fibrosis transmembrane conductance regulator) gene identified in the patients with asthma and the statistic values obtained for the hypersecretion versus non-hypersecretors groups.
